# Supplementary material
Source: publisher figshare collection journal article supplement (https://sage.figshare.com/ndownloader/files/15264128)
Supplement: Supplementary file 1 [file 15264128]

## Sheet: table_egfrviii_and_solid_panel_
Supplementary Table 2. Genetic data (mutations, EGFRvIII status, and MGMT methylation status) for the 32 patients tested using the NGS Solid Tumor panel version 2.
Patient.ID	Lesion	VAF	Amplification.Level	Categorization
V2.0_PATIENT_001	GNAS:p.A368V	29.92	NA	VOUS
V2.0_PATIENT_001	AKT2:p.R208K	47.29	NA	VOUS
V2.0_PATIENT_001	TP53:p.G244S	48.09	NA	Pathogenic
V2.0_PATIENT_001	CREBBP:p.M2115_G2120DUP	16.58	NA	VOUS
V2.0_PATIENT_001	EGFR:AMP	NA	5	Pathogenic
V2.0_PATIENT_001	PIK3R1:p.G376R	20.21	NA	Pathogenic
V2.0_PATIENT_001	EGFR:vIII	88	NA	Pathogenic
V2.0_PATIENT_001	MGMT:Methyl	NA	NA	Pathogenic
V2.0_PATIENT_002	PBRM1:p.Y417IFS*3	3.99	NA	Pathogenic
V2.0_PATIENT_002	EP300:p.S106G	50.68	NA	Likely Benign
V2.0_PATIENT_002	BRCA2:p.P606L	2.29	NA	VOUS
V2.0_PATIENT_002	EGFR:AMP	NA	3	Pathogenic
V2.0_PATIENT_002	ERBB3:p.R1265P	51.08	NA	VOUS
V2.0_PATIENT_002	EGFR:vIII	94	NA	Pathogenic
V2.0_PATIENT_003	EGFR:p.I981F	3.46	NA	VOUS
V2.0_PATIENT_003	FGFR3:p.V321M	50.78	NA	VOUS
V2.0_PATIENT_003	PTEN:p.?	56.07	NA	Pathogenic
V2.0_PATIENT_003	ABL1:p.R351Q	36	NA	VOUS
V2.0_PATIENT_003	NF1:p.S1838C	35.57	NA	VOUS
V2.0_PATIENT_003	NOTCH1:p.G889S	47.74	NA	VOUS
V2.0_PATIENT_003	EGFR:AMP	NA	4	Pathogenic
V2.0_PATIENT_003	EGFR:vIII	81	NA	Pathogenic
V2.0_PATIENT_004	ARID1A:p.G1792D	3.67	NA	VOUS
V2.0_PATIENT_004	ARID1A:p.G180S	2.33	NA	VOUS
V2.0_PATIENT_004	EP300:p.A22T	3.47	NA	VOUS
V2.0_PATIENT_004	ERG:p.G232R	2.04	NA	VOUS
V2.0_PATIENT_004	MAPK1:p.P23L	4.42	NA	VOUS
V2.0_PATIENT_004	APC:p.E761K	2.43	NA	VOUS
V2.0_PATIENT_004	PIK3CB:p.A697V	3.5	NA	VOUS
V2.0_PATIENT_004	JAK1:p.S398F	2.86	NA	VOUS
V2.0_PATIENT_004	APC:p.S4F	3.17	NA	VOUS
V2.0_PATIENT_004	MTOR:p.E1290K	12.48	NA	VOUS
V2.0_PATIENT_004	FUBP1:p.G277E	20	NA	VOUS
V2.0_PATIENT_004	FGFR3:p.P68S	13.95	NA	VOUS
V2.0_PATIENT_004	SLIT2:p.A1390V	2.31	NA	VOUS
V2.0_PATIENT_004	KMT2C:p.?	2.5	NA	Pathogenic
V2.0_PATIENT_004	NOTCH2:p.G195D	2.14	NA	VOUS
V2.0_PATIENT_004	APC:p.P1925S	2.11	NA	VOUS
V2.0_PATIENT_004	PIK3R1:p.G375E	3.68	NA	VOUS
V2.0_PATIENT_004	NOTCH2:p.C1383Y	3.14	NA	VOUS
V2.0_PATIENT_004	EPHA3:p.V759M	8.11	NA	VOUS
V2.0_PATIENT_004	MET:p.Q1043*	2.46	NA	VOUS
V2.0_PATIENT_004	KMT2C:p.T4547I	2.41	NA	VOUS
V2.0_PATIENT_004	KMT2C:p.D4398N	9.73	NA	VOUS
V2.0_PATIENT_004	SF3B1:p.G693D	9.11	NA	VOUS
V2.0_PATIENT_004	IDH1:p.R132H	38.26	NA	Pathogenic
V2.0_PATIENT_004	FUBP1:p.G17D	2.57	NA	VOUS
V2.0_PATIENT_004	NOTCH2:p.S1609F	3.61	NA	VOUS
V2.0_PATIENT_004	TGFBR2:p.E341K	2.6	NA	VOUS
V2.0_PATIENT_004	TGFBR2:p.S573L	2.75	NA	VOUS
V2.0_PATIENT_004	SETD2:p.E1692K	7.35	NA	VOUS
V2.0_PATIENT_004	RAD50:p.M1197I	8.57	NA	VOUS
V2.0_PATIENT_004	FGFR4:p.T541I	2.73	NA	VOUS
V2.0_PATIENT_004	EGFR:p.R958H	2.4	NA	VOUS
V2.0_PATIENT_004	RET:p.V283M	2.33	NA	VOUS
V2.0_PATIENT_004	RET:p.A641V	2.77	NA	VOUS
V2.0_PATIENT_004	MSH6:p.V1210M	29.56	NA	VOUS
V2.0_PATIENT_004	FGFR2:p.G103D	2.96	NA	VOUS
V2.0_PATIENT_004	PDGFRA:p.V84I	3.22	NA	VOUS
V2.0_PATIENT_004	TET2:p.C332Y	16.96	NA	VOUS
V2.0_PATIENT_004	PIK3R1:p.G23S	2.31	NA	VOUS
V2.0_PATIENT_004	MEN1:p.A472V	2.59	NA	VOUS
V2.0_PATIENT_004	MEN1:p.?	2.15	NA	Pathogenic
V2.0_PATIENT_004	PAK1:p.A297V	3.35	NA	VOUS
V2.0_PATIENT_004	SETD2:p.R385K	2.14	NA	VOUS
V2.0_PATIENT_004	PBRM1:p.S178F	14.16	NA	VOUS
V2.0_PATIENT_004	MITF:p.P159S	2.39	NA	VOUS
V2.0_PATIENT_004	ERBB3:p.P583S	2.41	NA	VOUS
V2.0_PATIENT_004	ERBB3:p.W948*	3.08	NA	VOUS
V2.0_PATIENT_004	FGFR2:p.L810F	6.87	NA	VOUS
V2.0_PATIENT_004	BRCA2:p.E1120K	5.19	NA	VOUS
V2.0_PATIENT_004	BRCA2:p.Q2009*	22.61	NA	Pathogenic
V2.0_PATIENT_004	KMT2C:p.E3733K	4.4	NA	VOUS
V2.0_PATIENT_004	KMT2C:p.G2706E	6.24	NA	VOUS
V2.0_PATIENT_004	NTRK3:p.S755N	2.52	NA	VOUS
V2.0_PATIENT_004	NTRK3:p.P425S	2.38	NA	VOUS
V2.0_PATIENT_004	IGF1R:p.G1008E	3.05	NA	VOUS
V2.0_PATIENT_004	KDM5A:p.S1674F	4.28	NA	VOUS
V2.0_PATIENT_004	ARID2:p.D109N	11.44	NA	VOUS
V2.0_PATIENT_004	ARID2:p.Q1604*	2.45	NA	Pathogenic
V2.0_PATIENT_004	CREBBP:p.S2041F	13.42	NA	VOUS
V2.0_PATIENT_004	CREBBP:p.S1687F	3.47	NA	VOUS
V2.0_PATIENT_004	MDM2:p.S163F	2.2	NA	VOUS
V2.0_PATIENT_004	PALB2:p.V677L	3.94	NA	VOUS
V2.0_PATIENT_004	PALB2:p.P117S	7.77	NA	VOUS
V2.0_PATIENT_004	CDH1:p.A102V	5.82	NA	VOUS
V2.0_PATIENT_004	ERBB4:p.S351N	2.62	NA	VOUS
V2.0_PATIENT_004	VHL:p.D187N	8.3	NA	VOUS
V2.0_PATIENT_004	PTCH1:p.G110E	12.73	NA	VOUS
V2.0_PATIENT_004	TSC1:p.A983T	5.11	NA	VOUS
V2.0_PATIENT_004	NOTCH1:p.C1372Y	4.97	NA	VOUS
V2.0_PATIENT_004	NOTCH1:p.A1135V	2.79	NA	VOUS
V2.0_PATIENT_004	NOTCH1:	11.15	NA	VOUS
V2.0_PATIENT_004	NOTCH1:p.G974D	9.23	NA	VOUS
V2.0_PATIENT_004	NOTCH3:p.T257I	2.64	NA	VOUS
V2.0_PATIENT_004	AKT2:p.D91N	13.29	NA	VOUS
V2.0_PATIENT_004	CIC:p.P667S	4	NA	VOUS
V2.0_PATIENT_004	CIC:p.P1240L	3.53	NA	VOUS
V2.0_PATIENT_004	WT1:p.T358M	2.05	NA	VOUS
V2.0_PATIENT_004	WT1:p.G338E	2.78	NA	VOUS
V2.0_PATIENT_004	MEN1:p.G477S	2.42	NA	VOUS
V2.0_PATIENT_004	AURKA:p.E397K	6.56	NA	VOUS
V2.0_PATIENT_004	GNAS:p.L177F	11.95	NA	VOUS
V2.0_PATIENT_004	ERG:p.P351L	11.07	NA	VOUS
V2.0_PATIENT_004	IGF1R:p.P1271L	14	NA	VOUS
V2.0_PATIENT_004	FGFR1:p.A23T	2.4	NA	VOUS
V2.0_PATIENT_004	NTRK1:p.G226D	2.63	NA	VOUS
V2.0_PATIENT_004	EP300:p.R2184K	3.72	NA	VOUS
V2.0_PATIENT_004	KDM6A:p.G1366E	3.05	NA	VOUS
V2.0_PATIENT_004	KDM5C:p.E1352K	5.53	NA	VOUS
V2.0_PATIENT_004	KDM5C:p.R1314W	3.34	NA	VOUS
V2.0_PATIENT_004	ATRX:	36	NA	VOUS
V2.0_PATIENT_004	ATRX:p.G602S	2.87	NA	VOUS
V2.0_PATIENT_004	ATRX:p.E162K	9.98	NA	VOUS
V2.0_PATIENT_004	BTK:p.V449I	2.23	NA	VOUS
V2.0_PATIENT_004	BTK:p.S72F	7.25	NA	VOUS
V2.0_PATIENT_004	BTK:p.R47*	9.95	NA	VOUS
V2.0_PATIENT_004	ERBB2:p.W482*	2.51	NA	VOUS
V2.0_PATIENT_004	RAD51C:p.C147Y	5.4	NA	VOUS
V2.0_PATIENT_004	BRIP1:p.T667I	11.5	NA	VOUS
V2.0_PATIENT_004	NTRK1:p.*797AEXT*8	8.49	NA	VOUS
V2.0_PATIENT_004	DDR2:p.D395N	6.45	NA	VOUS
V2.0_PATIENT_004	CREBBP:p.P916S	7.15	NA	VOUS
V2.0_PATIENT_004	DNMT3A:p.D204N	2.82	NA	VOUS
V2.0_PATIENT_004	MSH6:p.P991L	2.43	NA	VOUS
V2.0_PATIENT_004	PTCH1:p.V927I	4.75	NA	VOUS
V2.0_PATIENT_004	PTCH1:p.D857N	3.43	NA	VOUS
V2.0_PATIENT_004	PTCH1:p.V588I	2.25	NA	VOUS
V2.0_PATIENT_004	PTCH1:p.S494F	2.82	NA	VOUS
V2.0_PATIENT_004	NF1:p.P2655L	3.29	NA	VOUS
V2.0_PATIENT_004	FGFR1:p.P842S	2.56	NA	VOUS
V2.0_PATIENT_004	STAG2:p.G805E	3.26	NA	VOUS
V2.0_PATIENT_004	FGFR1:p.S596F	11.4	NA	VOUS
V2.0_PATIENT_004	NOTCH3:p.L1023F	3.12	NA	VOUS
V2.0_PATIENT_004	SMARCA4:p.D1466N	6.58	NA	VOUS
V2.0_PATIENT_004	GNAQ:p.?	3.02	NA	VOUS
V2.0_PATIENT_004	GNAQ:p.S68F	2.69	NA	VOUS
V2.0_PATIENT_004	NTRK2:p.L431F	12.7	NA	VOUS
V2.0_PATIENT_004	SYK:p.E144K	2.4	NA	VOUS
V2.0_PATIENT_004	CIC:p.D1468N	2.38	NA	VOUS
V2.0_PATIENT_004	CIC:p.S1503F	2.77	NA	VOUS
V2.0_PATIENT_004	CIC:p.G1542S	16.3	NA	VOUS
V2.0_PATIENT_004	MAP2K4:p.P82S	4.48	NA	VOUS
V2.0_PATIENT_004	CDKN2A:p.R138K	2.94	NA	VOUS
V2.0_PATIENT_004	TRAF7:p.P79S	3.95	NA	VOUS
V2.0_PATIENT_004	CREBBP:p.G2220D	2.69	NA	VOUS
V2.0_PATIENT_004	JAK2:p.E177K	2.2	NA	VOUS
V2.0_PATIENT_004	AKT3:p.P121S	14.38	NA	VOUS
V2.0_PATIENT_004	FGFR1:p.G225D	3.49	NA	VOUS
V2.0_PATIENT_004	BRCA2:p.L2653F	2.1	NA	VOUS
V2.0_PATIENT_004	RAD51B:p.S57N	6.31	NA	VOUS
V2.0_PATIENT_004	TP53:p.Y220PFS*28	90.19	NA	Pathogenic
V2.0_PATIENT_004	MGMT:Methyl	NA	NA	Pathogenic
V2.0_PATIENT_005	NF1:p.W2229*	5.81	NA	Pathogenic
V2.0_PATIENT_005	PTEN:p.?	4.48	NA	Pathogenic
V2.0_PATIENT_005	GNAQ:p.A108V	3.25	NA	VOUS
V2.0_PATIENT_005	PTEN:p.M134I	42.13	NA	Probably DA
V2.0_PATIENT_005	SYK:p.A419T	10.88	NA	VOUS
V2.0_PATIENT_005	PTCH1:p.Y1316TFS*56	6.19	NA	Pathogenic
V2.0_PATIENT_005	JAK2:p.?	18.24	NA	VOUS
V2.0_PATIENT_005	FGF3:p.Q195*	14.35	NA	VOUS
V2.0_PATIENT_005	JAK3:p.M558I	14.28	NA	VOUS
V2.0_PATIENT_005	APC:p.S2244N	5.53	NA	VOUS
V2.0_PATIENT_005	CIC:p.G784R	24	NA	VOUS
V2.0_PATIENT_005	MAP2K2:p.P304S	8.1	NA	VOUS
V2.0_PATIENT_005	NTRK2:p.R14Q	3.29	NA	VOUS
V2.0_PATIENT_005	EZH2:p.?	10.21	NA	Pathogenic
V2.0_PATIENT_005	SUFU:p.G294D	10.08	NA	VOUS
V2.0_PATIENT_005	APC:p.G2610R	13.94	NA	VOUS
V2.0_PATIENT_005	SETD2:p.A2458T	31.71	NA	VOUS
V2.0_PATIENT_005	SMARCA4:p.D1025N	9.38	NA	VOUS
V2.0_PATIENT_005	PAK1:p.P231S	10.74	NA	VOUS
V2.0_PATIENT_005	GNA11:p.V15M	3.44	NA	VOUS
V2.0_PATIENT_005	ARID2:p.P38S	12.04	NA	VOUS
V2.0_PATIENT_005	SETD2:p.S1088F	8.94	NA	VOUS
V2.0_PATIENT_005	ARID2:p.V1026I	16.48	NA	VOUS
V2.0_PATIENT_005	PBRM1:p.G171D	32.33	NA	VOUS
V2.0_PATIENT_005	ARID2:p.V1172I	4.55	NA	VOUS
V2.0_PATIENT_005	SMARCA4:p.G148E	8.8	NA	VOUS
V2.0_PATIENT_005	GNAS:p.?	2.71	NA	VOUS
V2.0_PATIENT_005	MSH6:p.F1088LFS*5	8.82	NA	Pathogenic
V2.0_PATIENT_005	NF1:p.?	26.5	NA	Pathogenic
V2.0_PATIENT_005	NF1:p.?	9.38	NA	Pathogenic
V2.0_PATIENT_005	MEN1:p.V167I	4.51	NA	VOUS
V2.0_PATIENT_005	RAD51D:p.?	4.65	NA	Probably DA
V2.0_PATIENT_005	BRCA1:p.V1054M	8.97	NA	VOUS
V2.0_PATIENT_005	BRAF:p.T401I	5.15	NA	VOUS
V2.0_PATIENT_005	ARID2:p.A496T	16.21	NA	VOUS
V2.0_PATIENT_005	CREBBP:p.A1473V	9.6	NA	VOUS
V2.0_PATIENT_005	ARID1A:p.G455E	5.03	NA	VOUS
V2.0_PATIENT_005	TP53:p.G262D	5.31	NA	Probably DA
V2.0_PATIENT_005	GNAS:p.G251S	9.87	NA	VOUS
V2.0_PATIENT_005	MDM2:p.C206R	33.49	NA	VOUS
V2.0_PATIENT_005	RB1:p.G617D	2.84	NA	VOUS
V2.0_PATIENT_005	EP300:p.P1096S	3.71	NA	VOUS
V2.0_PATIENT_005	MEN1:p.R465Q	3.24	NA	VOUS
V2.0_PATIENT_005	NTRK3:p.A192T	6.85	NA	VOUS
V2.0_PATIENT_005	KDM6A:p.D1412N	19.57	NA	VOUS
V2.0_PATIENT_005	KDM5C:p.P1487L	3.38	NA	VOUS
V2.0_PATIENT_005	KDM5A:p.P670L	13.72	NA	VOUS
V2.0_PATIENT_005	STAG2:p.S320N	15.83	NA	VOUS
V2.0_PATIENT_005	STAG2:p.P1249S	12.07	NA	VOUS
V2.0_PATIENT_005	CREBBP:p.E1536K	6.17	NA	VOUS
V2.0_PATIENT_005	BAP1:p.A574T	7.43	NA	VOUS
V2.0_PATIENT_005	TP53:p.H179Y	3.03	NA	Pathogenic
V2.0_PATIENT_005	TP53:p.P152L	48.55	NA	Pathogenic
V2.0_PATIENT_005	TP53:p.S127F	7.79	NA	Pathogenic
V2.0_PATIENT_005	TSHR:p.A564V	8.57	NA	VOUS
V2.0_PATIENT_005	MSH6:p.T1219I	16.63	NA	VOUS
V2.0_PATIENT_005	EP300:p.R2012K	9.49	NA	VOUS
V2.0_PATIENT_005	IGF1R:p.G171E	4.25	NA	VOUS
V2.0_PATIENT_005	TSC2:p.D376N	8.01	NA	VOUS
V2.0_PATIENT_005	TSC2:p.T1542I	6.45	NA	VOUS
V2.0_PATIENT_005	ATRX:p.A1730T	22.63	NA	VOUS
V2.0_PATIENT_005	ARID1A:p.G1644D	20.55	NA	VOUS
V2.0_PATIENT_005	MTOR:p.A26T	2.51	NA	VOUS
V2.0_PATIENT_005	ARID1A:p.D331N	11.23	NA	VOUS
V2.0_PATIENT_005	FUBP1:p.A585V	5.85	NA	VOUS
V2.0_PATIENT_005	NRAS:p.G115R	8.3	NA	VOUS
V2.0_PATIENT_005	NOTCH2:p.S1609F	10.28	NA	VOUS
V2.0_PATIENT_005	NF1:p.A12V	7.56	NA	VOUS
V2.0_PATIENT_005	PIK3R1:p.G644D	8.96	NA	VOUS
V2.0_PATIENT_005	ALK:p.?	15.66	NA	VOUS
V2.0_PATIENT_005	KDM6A:p.?	8.83	NA	Pathogenic
V2.0_PATIENT_005	ESR1:p.S578L	15.88	NA	VOUS
V2.0_PATIENT_005	MET:p.V790I	22.38	NA	VOUS
V2.0_PATIENT_005	PBRM1:p.R236K	6.3	NA	VOUS
V2.0_PATIENT_005	TRAF7:p.D75N	8.14	NA	VOUS
V2.0_PATIENT_005	FGFR3:p.A360T	10.91	NA	VOUS
V2.0_PATIENT_005	NOTCH2:p.S538N	4.84	NA	VOUS
V2.0_PATIENT_005	ALK:p.G1286R	5.88	NA	VOUS
V2.0_PATIENT_005	EPHA3:p.P329S	9.69	NA	VOUS
V2.0_PATIENT_005	MSH6:p.S348F	10.7	NA	VOUS
V2.0_PATIENT_005	MAP2K1:p.G22E	13.53	NA	VOUS
V2.0_PATIENT_005	MTOR:p.V855I	2.72	NA	VOUS
V2.0_PATIENT_005	TET2:p.G520D	3.49	NA	VOUS
V2.0_PATIENT_005	KDR:p.P1280L	21.28	NA	VOUS
V2.0_PATIENT_005	TET2:p.W1847*	13.81	NA	Pathogenic
V2.0_PATIENT_005	ERBB3:p.A304V	5.62	NA	VOUS
V2.0_PATIENT_005	MGMT:Methyl	NA	NA	Pathogenic
V2.0_PATIENT_006	EGFR:AMP	NA	6	Pathogenic
V2.0_PATIENT_006	PIK3CB:p.D1067V	36.39	NA	Pathogenic
V2.0_PATIENT_006	NF1:p.D1122G	3.02	NA	VOUS
V2.0_PATIENT_006	MAP2K2:p.R371Q	45.91	NA	VOUS
V2.0_PATIENT_006	HRAS:p.R68W	38.98	NA	VOUS
V2.0_PATIENT_006	APC:p.A1670V	48.58	NA	VOUS
V2.0_PATIENT_006	EGFR:vIII	20	NA	Pathogenic
V2.0_PATIENT_006	EGFR:vIII	23	NA	Pathogenic
V2.0_PATIENT_007	RET:p.L1018F	58.47	NA	VOUS
V2.0_PATIENT_007	ATRX:p.V939F	9.23	NA	VOUS
V2.0_PATIENT_007	PTEN:p.C136Y	6.86	NA	Pathogenic
V2.0_PATIENT_007	PTPN11:p.A72V	11.04	NA	Pathogenic
V2.0_PATIENT_007	GATA3:p.D160E	30.92	NA	VOUS
V2.0_PATIENT_007	NF1:p.R461*	16.58	NA	Pathogenic
V2.0_PATIENT_008	JAK3:p.R451Q	12.64	NA	VOUS
V2.0_PATIENT_008	EGFR:AMP	NA	2	Pathogenic
V2.0_PATIENT_008	ESR2:p.E274Q	42.2	NA	VOUS
V2.0_PATIENT_008	EGFR:p.A289V	88.41	NA	Pathogenic
V2.0_PATIENT_008	MITF:p.R414G	3.69	NA	VOUS
V2.0_PATIENT_009	PAK1:p.S382L	51.27	NA	VOUS
V2.0_PATIENT_009	EGFR:AMP	NA	9	Pathogenic
V2.0_PATIENT_009	EGFR:p.A289V	90.6	NA	Pathogenic
V2.0_PATIENT_010	KMT2C:p.L3311F	63.98	NA	VOUS
V2.0_PATIENT_010	TRAF7:p.K308RFS*22	13.49	NA	Pathogenic
V2.0_PATIENT_010	BRCA2:p.D1864HFS*8	57.38	NA	Pathogenic
V2.0_PATIENT_011	EGFR:AMP	NA	6	Pathogenic
V2.0_PATIENT_011	TP53:p.K132E	80.64	NA	Pathogenic
V2.0_PATIENT_011	IGF1R:p.A701T	47.84	NA	VOUS
V2.0_PATIENT_011	MGMT:Methyl	NA	NA	Pathogenic
V2.0_PATIENT_012	RB1:p.N123D	48.24	NA	VOUS
V2.0_PATIENT_012	PIK3R1:p.D560H	17.39	NA	Pathogenic
V2.0_PATIENT_012	MGMT:Methyl	NA	NA	Pathogenic
V2.0_PATIENT_013	FGFR1:p.T757S	2.48	NA	VOUS
V2.0_PATIENT_013	PTEN:p.D24G	33.83	NA	Pathogenic
V2.0_PATIENT_013	EGFR:AMP	NA	10	Pathogenic
V2.0_PATIENT_013	MAPK1:p.A7DEL	77.59	NA	VOUS
V2.0_PATIENT_013	EGFR:p.R108K	91.16	NA	Pathogenic
V2.0_PATIENT_013	MGMT:Methyl	NA	NA	Pathogenic
V2.0_PATIENT_014	PTEN:p.K125E	50.79	NA	Pathogenic
V2.0_PATIENT_014	MTOR:p.R360Q	2.8	NA	VOUS
V2.0_PATIENT_014	NOTCH1:p.D338G	26.56	NA	VOUS
V2.0_PATIENT_014	PTEN:p.Y180*	4.57	NA	Pathogenic
V2.0_PATIENT_014	EGFR:AMP	NA	9	Pathogenic
V2.0_PATIENT_014	EGFR:vIII	54	NA	Pathogenic
V2.0_PATIENT_014	EGFR:vIII	47	NA	Pathogenic
V2.0_PATIENT_015	BRIP1:p.G729*	20.67	NA	Pathogenic
V2.0_PATIENT_015	TET2:p.S1577R	48.64	NA	VOUS
V2.0_PATIENT_015	KDR:p.C482R	48.22	NA	Likely Benign
V2.0_PATIENT_015	ATRX:p.K993NFS*9	51.96	NA	Pathogenic
V2.0_PATIENT_015	PDGFRA:p.T106KFS*19	8.53	NA	VOUS
V2.0_PATIENT_015	TET2:p.N1636K	24.11	NA	VOUS
V2.0_PATIENT_015	BRIP1:p.?	36.78	NA	Pathogenic
V2.0_PATIENT_015	GNAS:p.R605H	11.02	NA	VOUS
V2.0_PATIENT_015	MGMT:Methyl	NA	NA	Pathogenic
V2.0_PATIENT_016	EP300:p.N478S	71.64	NA	VOUS
V2.0_PATIENT_016	EGFR:AMP	NA	3	Pathogenic
V2.0_PATIENT_017	SUZ12:p.R654*	33.71	NA	Probably DA
V2.0_PATIENT_017	DNMT3A:p.V510I	37.7	NA	VOUS
V2.0_PATIENT_017	TSHR:p.C29W	49.64	NA	VOUS
V2.0_PATIENT_018	ATRX:p.A419V	47.74	NA	VOUS
V2.0_PATIENT_018	MDM2:p.V20DEL	28.83	NA	VOUS
V2.0_PATIENT_018	PIK3R1:p.G376R	42.76	NA	Pathogenic
V2.0_PATIENT_018	PTCH1:p.G1343R	50.36	NA	VOUS
V2.0_PATIENT_018	EGFR:p.A289V	92.98	NA	Pathogenic
V2.0_PATIENT_018	EGFR:p.R669Q	96.2	NA	VOUS
V2.0_PATIENT_018	EGFR:AMP	NA	8	Pathogenic
V2.0_PATIENT_018	MGMT:Methyl	NA	NA	Pathogenic
V2.0_PATIENT_019	TP53:p.?	42.7	NA	Pathogenic
V2.0_PATIENT_019	TP53:p.Q192SFS*55	32.38	NA	Pathogenic
V2.0_PATIENT_019	PALB2:p.G1121VFS*3	43.52	NA	Pathogenic
V2.0_PATIENT_019	EGFR:p.A767_V769DUP	55.7	NA	Pathogenic
V2.0_PATIENT_020	DNMT3A:p.R720C	22.93	NA	VOUS
V2.0_PATIENT_020	ERBB4:p.T731M	51.79	NA	VOUS
V2.0_PATIENT_020	PDGFRA:p.V536E	18.14	NA	Pathogenic
V2.0_PATIENT_020	ABL1:p.P499L	37.78	NA	Probably DA
V2.0_PATIENT_020	TP53:p.R110L	83.74	NA	Pathogenic
V2.0_PATIENT_021	NF1:p.R2349VFS*47	15.59	NA	Pathogenic
V2.0_PATIENT_021	BAP1:p.A428T	53.24	NA	VOUS
V2.0_PATIENT_021	NOTCH3:p.A1342D	53.59	NA	VOUS
V2.0_PATIENT_021	ARID1A:p.G191A	50.5	NA	VOUS
V2.0_PATIENT_022	EGFR:p.A244T	98.06	NA	Pathogenic
V2.0_PATIENT_022	EGFR:AMP	NA	7	Pathogenic
V2.0_PATIENT_022	ATM:p.E522IFS*43FS	50.88	NA	Pathogenic
V2.0_PATIENT_022	MRE11A:p.Q357K	42.89	NA	VOUS
V2.0_PATIENT_023	CCND2:p.S271L	47.27	NA	VOUS
V2.0_PATIENT_023	ATM:p.G1459R	11.18	NA	VOUS
V2.0_PATIENT_023	PIK3CA:p.E545A	7.09	NA	Pathogenic
V2.0_PATIENT_023	MGMT:Methyl	NA	NA	Pathogenic
V2.0_PATIENT_024	EGFR:p.R222C	5.5	NA	Pathogenic
V2.0_PATIENT_024	PTEN:p.V133*	77.27	NA	Pathogenic
V2.0_PATIENT_024	APC:p.I1307K	45.46	NA	Likely Benign
V2.0_PATIENT_024	EGFR:p.C617G	9.69	NA	VOUS
V2.0_PATIENT_024	KDM6A:p.L967S	39.13	NA	VOUS
V2.0_PATIENT_024	NOTCH3:p.N1118I	36.64	NA	VOUS
V2.0_PATIENT_024	EGFR:AMP	NA	7	Pathogenic
V2.0_PATIENT_024	KIT:p.T963A	48.61	NA	VOUS
V2.0_PATIENT_024	EGFR:vIII	63	NA	Pathogenic
V2.0_PATIENT_025	ATRX:p.Q883RFS*21	49.96	NA	Pathogenic
V2.0_PATIENT_025	MSH6:p.T764N	45.08	NA	VOUS
V2.0_PATIENT_025	IDH1:p.R132H	28.75	NA	Pathogenic
V2.0_PATIENT_025	TP53:p.N29TFS*15	62.8	NA	Pathogenic
V2.0_PATIENT_025	MGMT:Methyl	NA	NA	Pathogenic
V2.0_PATIENT_026	MTOR:p.R1009Q	51.09	NA	VOUS
V2.0_PATIENT_026	PTEN:p.R173C	75.98	NA	Pathogenic
V2.0_PATIENT_026	EGFR:p.R108G	7.99	NA	Probably DA
V2.0_PATIENT_026	EGFR:AMP	NA	5	Pathogenic
V2.0_PATIENT_026	STAG2:p.R604*	85.94	NA	Pathogenic
V2.0_PATIENT_026	EGFR:vIII	92	NA	Pathogenic
V2.0_PATIENT_027	PDGFRA:p.I1025V	50.32	NA	VOUS
V2.0_PATIENT_027	NOTCH2:p.L372V	3.6	NA	VOUS
V2.0_PATIENT_027	BRCA1:p.S1634C	50.78	NA	VOUS
V2.0_PATIENT_027	GNA11:p.Q152*	9.23	NA	VOUS
V2.0_PATIENT_027	NOTCH3:p.P2067S	13.81	NA	VOUS
V2.0_PATIENT_027	CREBBP:p.A1473T	14.33	NA	VOUS
V2.0_PATIENT_027	PTEN:p.D24G	10.28	NA	Pathogenic
V2.0_PATIENT_027	MGMT:Methyl	NA	NA	Pathogenic
V2.0_PATIENT_028	APC:p.L1393P	31.96	NA	VOUS
V2.0_PATIENT_028	NOTCH1:p.P2151S	33.31	NA	VOUS
V2.0_PATIENT_028	EGFR:AMP	NA	7	Pathogenic
V2.0_PATIENT_028	PIK3R1:p.G376R	38.11	NA	Pathogenic
V2.0_PATIENT_028	TSC2:p.F1668L	20.15	NA	VOUS
V2.0_PATIENT_028	KMT2C:p.L3904SFS*20	29.27	NA	Pathogenic
V2.0_PATIENT_029	AKT3:AMP	NA	4	Pathogenic
V2.0_PATIENT_029	EGFR:AMP	NA	9	Pathogenic
V2.0_PATIENT_029	EGFR:vIII	92	NA	Pathogenic
V2.0_PATIENT_029	MGMT:Methyl	NA	NA	Pathogenic
V2.0_PATIENT_030	SLIT2:p.F1240V	25.3	NA	VOUS
V2.0_PATIENT_030	PIK3R1:p.R639*	43.31	NA	Pathogenic
V2.0_PATIENT_030	EGFR:AMP	NA	7	Pathogenic
V2.0_PATIENT_030	TSC2:p.F1149L	44.62	NA	VOUS
V2.0_PATIENT_030	EGFR:vIII	88	NA	Pathogenic
V2.0_PATIENT_031	MTOR:p.A2248T	49.46	NA	VOUS
V2.0_PATIENT_031	TSHR:p.E124D	46.45	NA	VOUS
V2.0_PATIENT_031	PTPN11:p.A461G	17.88	NA	Probably DA
V2.0_PATIENT_031	PTEN:p.T26PFS*28	56.63	NA	Pathogenic
V2.0_PATIENT_031	MGMT:Methyl	NA	NA	Pathogenic
V2.0_PATIENT_032	RAD50:p.M735*	43.37	NA	Pathogenic
V2.0_PATIENT_032	ATM:p.S1878L	38.79	NA	VOUS
V2.0_PATIENT_032	TP53:p.N131DEL	77.3	NA	Pathogenic
V2.0_PATIENT_032	RAD50:p.R823*	45.07	NA	Pathogenic
V2.0_PATIENT_032	ERBB3:p.R388Q	50.73	NA	VOUS
V2.0_PATIENT_032	EGFR:vIII	88	NA	Pathogenic
V2.0_PATIENT_032	EGFR:vIII	87	NA	Pathogenic
